# Supplementary figures and images for: Ex Vivo Mitochondrial Respiration Parallels Biochemical Response to Ibrutinib in CLL Cells
Source: MDPI journal article supplement (doi:10.3390/cancers13020354), 2021-01-19

Supplement to Figure 1M

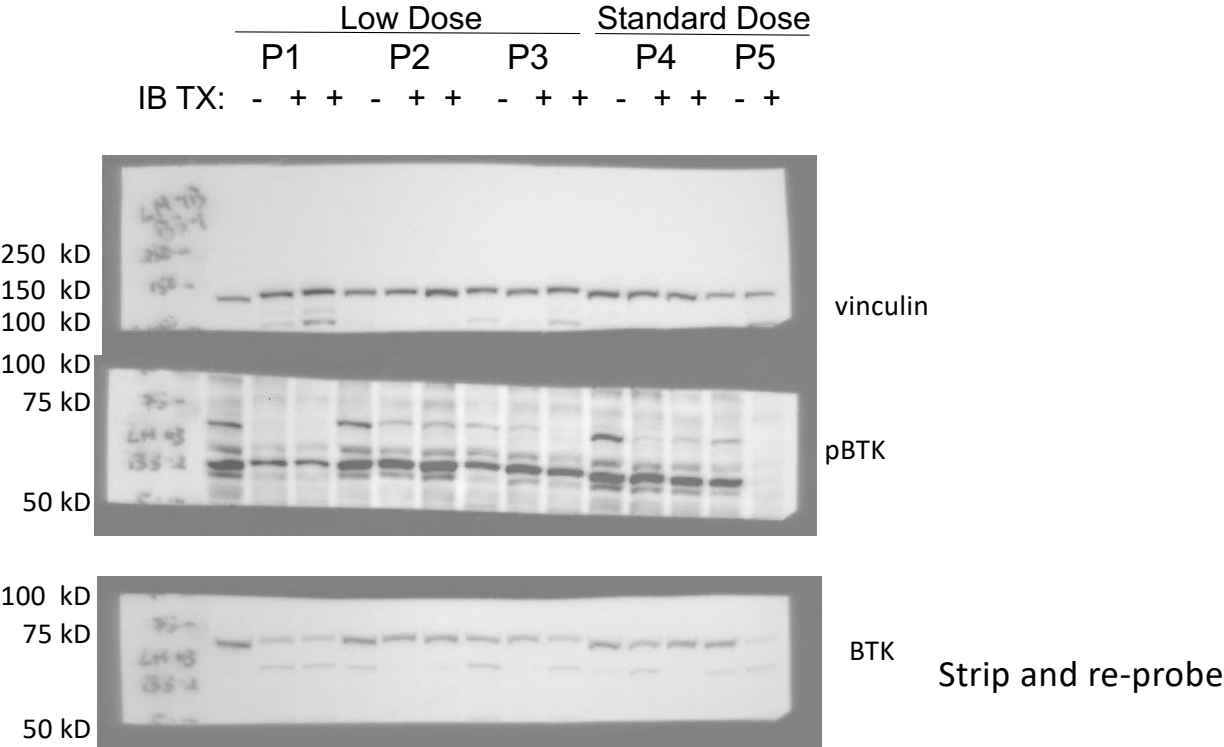

Supplement to Figure 1N

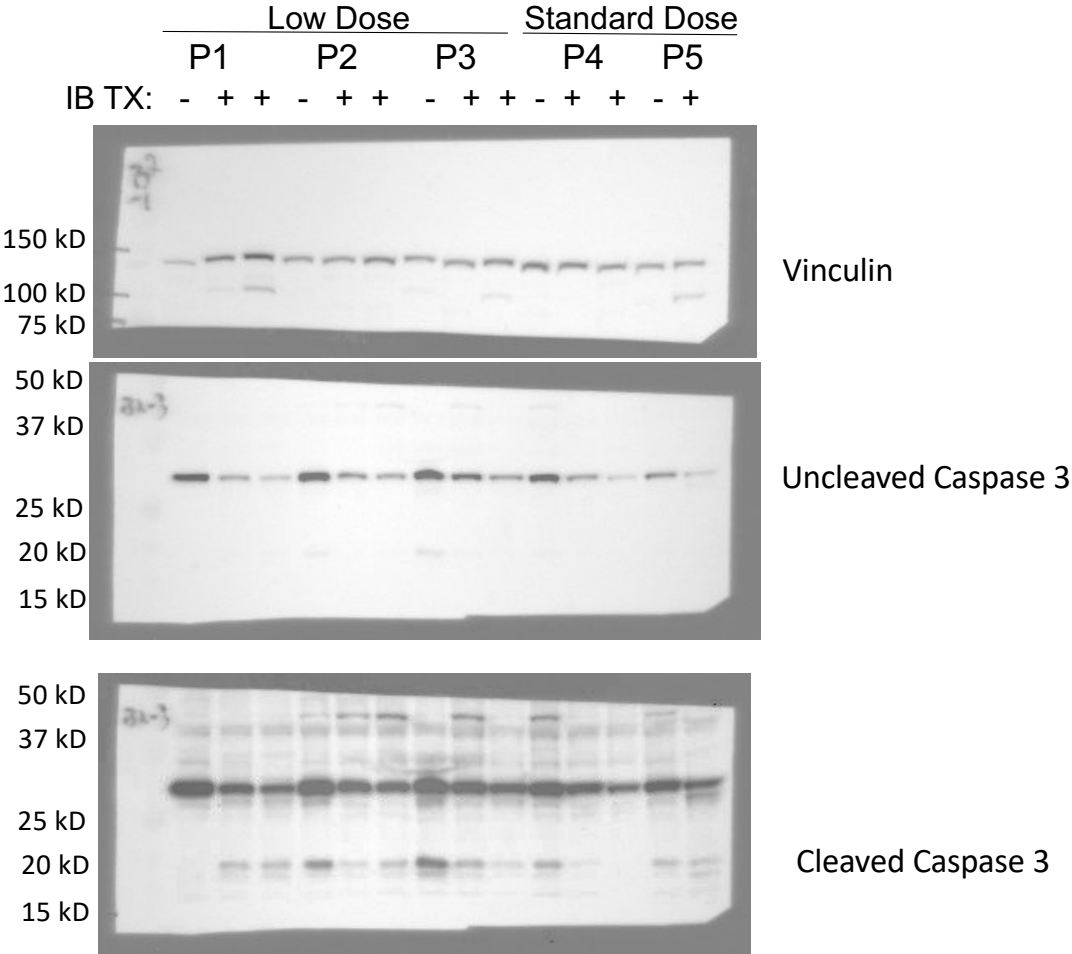

Supplement: s1 [file s1]
